# Supplementary material for: Development and evaluation of resilient black scented rice genotypes for water deficit environments
Source: Research Square preprint supplement (doi:10.21203/rs.3.rs-7838488/v1), 2025-11-13
Supplement: Supplementary file 1 [file e91484812a8e51936023dc06.docx]

Supplementary Table 1. Putative candidate genes and number of InDels/SNPs detected between Chakhao amubi and Apo in *qDTY1.1* region and their positions.

| **Locus ID** | **Gene** | **Position** | **SNP/INDEL** | |
| --- | --- | --- | --- | --- |
| **Chakhao amubi** | **Apo** |
| LOC_Os01g62190 | ZOS1-15 - C2H2 zinc finger protein, expressed | 36001264 | G | T |
| 36001265 | A | T |
| 36001835 | T | A |
| 36001952 | G | A |
| LOC_Os01g62410 | MYB family transcription factor, putative, expressed | 36125828 | T | A |
| 36125834 | C | G |
| 36122881 | C | A |
| 36123089 - 36123091 | TGG (insertion) | --- |
| 36124695 | A | G |
| 36124925 | G | A |
| LOC_Os01g62900 | Amino acid kinase, putative, expressed | 36437252 - 36437260 | --------- | GAGGAGGAG(insertion) |
| 36438364 | C | T |
| 36439534 | T | G |
| 36439704 | G | T |
| 36440230 | C | T |
| 36440253 | C | T |
| LOC_Os01g64300 | DUF584 domain containing protein, putative, expressed | 37323895 | G | A |
| LOC_Os01g64360 | MYB family transcription factor, putative, expressed | 37358640 | A | G |
| LOC_Os01g64520 | Uricase, putative, expressed | 37447748 | C | T |
| 37448559 | A | G |
| 37449027 | T | A |
| 37449136 | C | A |
| 37449140 | A | G |
| 37449142 | A | G |
| 37449180 | G | A |
| LOC_Os01g64730 | bZIP transcription factor domain containing protein, expressed | 37560131 | C (insertion) | - |
| 37560390 | A (insertion) | - |
| 37560464 | T | G |
| 37560798 | G | C |
| 37560970 | A | G |
| 37561361 | G | T |
| 37561671 – 37561672 | -- | TA (insertion) |
| 37561702 | G | A |
| LOC_Os01g64750 | Sterol 3-beta-glucosyltransferase, putative, expressed | 37566103 | C | A |
| 37566212 | T | G |
| 37568393 | - | A (insertion) |
| 37568474 | A (insertion) | - |
| LOC_Os01g64970 | CAMK_CAMK_like.11 - CAMK includes calcium/calmodulin  depedent protein kinases, expressed | 37713116 | T | G |
| 37714532 | A | G |
| 37714535 | G | A |
| 37714816 | C | G |
| 37715088 | C | T |
| LOC_Os01g65520 | Sad1 / UNC-like C-terminal domain containing protein, putative,  expressed | 38030615 | T | C |
| 38030679 | G | T |
| 38030967 | C | T |
| 38031545 | G | A |
| 38032483 | G | A |
| 38032651 | C | A |
| 38033448 | A | G |
| 38033496 | A | C |
| 38033886 | G | T |
| LOC_Os01g60730 | RING-H2 finger protein, putative, expressed | 35123016 | T | A |
| LOC_Os01g63190 | Laccase precursor protein, putative, expressed | 36625540 | A | T |
| 36626331 | T | C |
| 36626513 | G | A |
| 36627562 | - | T (insertion) |
| LOC_Os01g61010 | Nodulin, putative, expressed | 35306087 | C | A |
| 35306918 | T | C |
| 35306979 | G | A |
| 35307083 | T | C |
| 35307216 | G | A |
| 35308080 | C | G |
| 35308343 | A | G |
| 35308434 | C | A |
| 35308619 | T (insertion) | - |
| 35308766 | C | T |
| 35308874 | A | G |
| LOC_Os01g64540 | Anthocyanidin 3-O-glucosyltransferase, putative, expressed | 37453280 | T | C |
| 37453312 | T | G |
| 37453654 | T | A |
| 37453691 | T | C |
| LOC_Os01g66000 | NADH dehydrogenase I subunit N, putative, expressed | 38308457 | T | C |
| 38308922 | A | G |
| 38308926 | C | T |
| LOC_Os01g65880 | Nodulin MtN3 family protein, putative, expressed | 38256161 | G | A |
| 38256175 | G | C |
| 38256203 | T | A |
| 38256218 | C | A |
| 38256220 | A | G |
| 38256221 | G | T |
| 38256222 | T | G |
| 38256223 | G | A |
| 38256225 | A | G |
| 38256276 | T | G |
| 38256290-38256291 | TC (insertion) | -- |
| 38257193 | A | G |
| 38257585 | - | T (insertion) |
| LOC_Os01g58420 | OsERF3 | 35523257 | T | C |
